# Supplementary material
Source: Springer Nature journal article supplement (https://www.springermedizin.de/resource/supplementary/12913_2007_468_MOESM1_ESM.pdf/9534830)
Supplement: MOESM1 [file 9534830]

**PROGRAM PLAN for sick-listed employees with low back pain**

**FEASIBILITY ASSESSMENT**  
Inventory of the need, basis and feasibility of a program plan for sick-listed employees with SMDs.

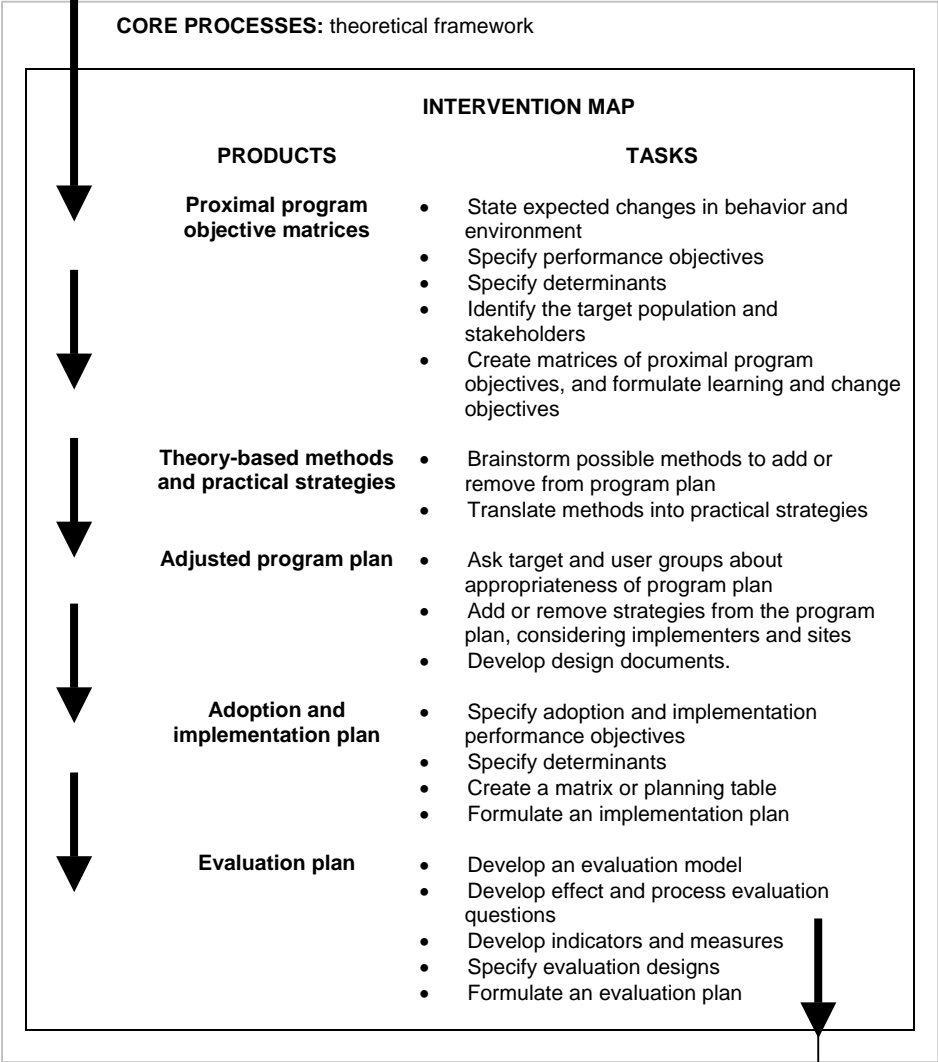

**EVALUATION**

**IMPLEMENTATION**
